# Supplementary material for: Pervasive read-through transcription of T-DNAs is frequent in tobacco BY-2 cells and can effectively induce silencing
Source: PubMed Central journal article supplement (PMC6196474; doi:10.1186/s12870-018-1482-3), 2018-10-22

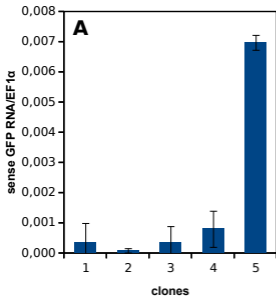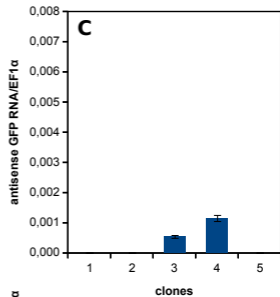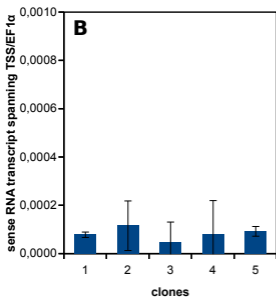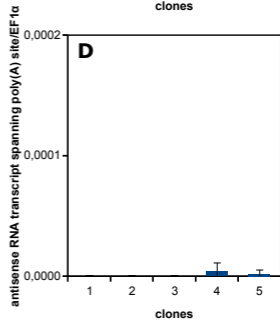

Supplement: 12870_2018_1482_MOESM4_ESM.pdf [file 12870_2018_1482_MOESM4_ESM.pdf]
